# Supplementary material for: Widespread service fragmentation for patients and families with tuberous sclerosis complex (TSC) in the Republic of Ireland
Source: PubMed Central journal article supplement (PMC11330946; doi:10.1007/s44162-024-00049-8), 2024-08-19
Supplement: 44162_2024_49_MOESM1_ESM.pdf [file 44162_2024_49_MOESM1_ESM.pdf]

**Supplementary information. Audit questions based on UK TSC recommendations.**

|     |                                                                                                                                           |
|-----|-------------------------------------------------------------------------------------------------------------------------------------------|
| Q1  | Age                                                                                                                                       |
| Q2  | Gender                                                                                                                                    |
| Q3  | Has genetic testing been carried out?                                                                                                     |
|     | <b>Central Nervous System</b>                                                                                                             |
| Q4  | Has a brain MRI been completed at baseline?                                                                                               |
| Q5  | Do you have access to MRI under GA if required?                                                                                           |
| Q6  | Does this patient have a known SEGA lesion?                                                                                               |
| Q7  | Do you have access to an MDT to discuss SEGA cases? (The MDT should consist of at least a neuroradiologist, neurologist and neurosurgeon) |
| Q8  | Do you have access to Everolimus for SEGA ?                                                                                               |
| Q9  | What is your first line treatment for SEGA- Surgery or Everolimus?                                                                        |
| Q10 | Has this patient had annual TAND check list completed?                                                                                    |
| Q11 | If the patient has a neuropsychiatric disorder, have they been seen by a neuropsychologist according to the NICE guideline?               |
| Q12 | Has the patient had a baseline neuropsychology assessment?                                                                                |
| Q13 | Has the patient had a developmental status assessment?                                                                                    |
| Q14 | If the patient has epilepsy, has SUDEP been discussed?                                                                                    |
| Q15 | Do you have access to an epilepsy surgery programme if required?                                                                          |
| Q16 | Do you have access to Everolimus for epilepsy?                                                                                            |
| Q17 | Do you have access to video EEG if required ?                                                                                             |
|     | <b>KIDNEY</b>                                                                                                                             |
| Q18 | Has a Kidney MRI been performed at baseline?                                                                                              |
| Q19 | Does the patient have AML >3cm                                                                                                            |
| Q20 | Do you have access to everolimus for AMLs?                                                                                                |
| Q21 | Has the patient's BP and kidney function been checked at baseline?                                                                        |
|     | <b>LUNG</b>                                                                                                                               |
| Q22 | Is the patient female of child-bearing age?                                                                                               |
| Q23 | If the patient is female, have they had an HRCT at baseline?                                                                              |
| Q24 | If the patient is a symptomatic adult male (chest symptoms), have they had an HRCT?                                                       |
| Q25 | If the patient had LAM at baseline, have they had a repeat HRCT 5-10 years after the baseline scan?                                       |
| Q26 | If the patient had LAM at baseline, have they had their pulmonary function test checked yearly?                                           |
| Q27 | If the patient has progressive LAM and deteriorating lung function, do you have access to mTOR inhibitors?                                |
|     | <b>HEART</b>                                                                                                                              |
| Q28 | Has the patient had a baseline ECG?                                                                                                       |
| Q29 | If the patient is a child, have they had an ECHO?                                                                                         |
| Q30 | Has the patient been having regular ECGs?                                                                                                 |
| Q31 | If the patient is an adult and has cardiac symptoms, have they had an ECHO?                                                               |
|     | <b>EYES</b>                                                                                                                               |
| Q32 | Has the patient seen an ophthalmologist at baseline?                                                                                      |
| Q33 | Has the patient had funduscopy examination during each clinic appointment? Please check 2 previous clinic letters.                        |
|     | <b>SKIN</b>                                                                                                                               |
| Q34 | Does this patient have facial angiofibroma?                                                                                               |
| Q35 | Do you have access to topical mTOR inhibitors?                                                                                            |
|     | <b>LIVER &amp; PANCREAS</b>                                                                                                               |
| Q36 | Has the patient had an MRI of the liver and pancreas?                                                                                     |
|     | <b>ACCESS</b>                                                                                                                             |
| Q37 | Do you have access to an adult neurologist in your clinic if required?                                                                    |
| Q38 | Do you have access to a paediatric neurologist in your clinic if required?                                                                |
| Q39 | Do you have access to a nephrologist in your clinic ?                                                                                     |
| Q40 | Do you have access to a respiratory physician in your clinic?                                                                             |
| Q41 | Do you have access to a geneticist in your clinic ?                                                                                       |
| Q42 | Do you have a specialist nurse in your clinic?                                                                                            |
| Q43 | Is your service funded by the HSE?                                                                                                        |
| Q44 | Do you have access to CAMHS for this patient ?                                                                                            |
| Q45 | Do you have access to an interventional radiologist ?                                                                                     |
| Q46 | Who leads your clinic?                                                                                                                    |
|     | Free text                                                                                                                                 |
